# Supplementary material for: The simple preparation of polyethylene glycol-based soft nanoparticles containing dual imaging probes
Source: Royal Society of Chemistry journal article supplement (doi:10.1039/c3tb20828a), 2013-01-01
Supplement: c3tb20828a.pdf [file c3tb20828a.pdf]

## Supporting Figure 1

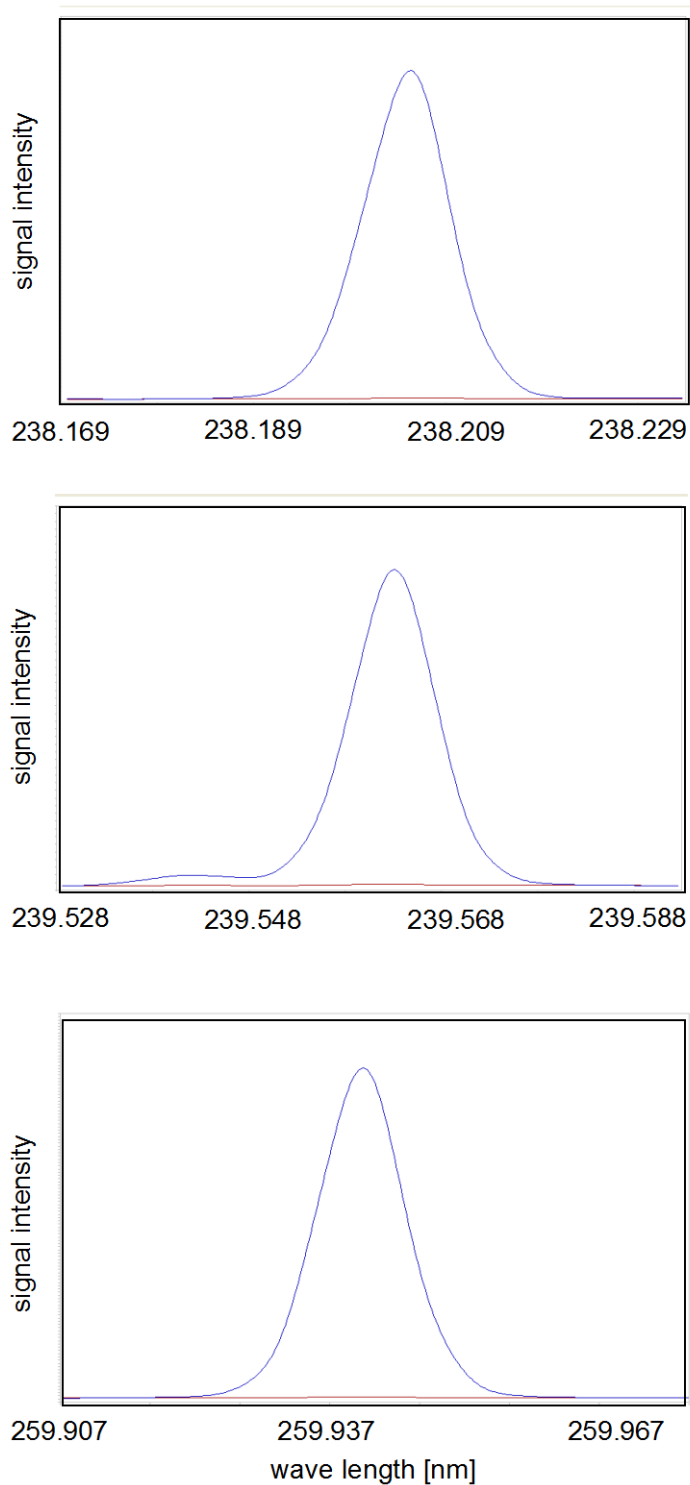

**Supporting Fig. 1 ICP-AES analysis (iCAP6300 Duo, Thermo Scientific) of nanoparticles containing ferritin.**
